# Supraorbital whiskers act as wind-antennae in rat anemotaxis

Matias Mugnaini<sup>1,2\*</sup>, Dhruv Mehrotra<sup>1,3,4\*</sup>, Federico Davoine<sup>1,5\*</sup>, Varun Sharma<sup>1,6\*</sup>,  
Ana Rita Mendes<sup>1,7\*</sup>, Michael Brecht<sup>1,8‡</sup> & Ann M. Clemens<sup>1,9‡</sup>

\* contributed equally

‡ shared senior authorship

<sup>1</sup> Neural Systems & Behavior, Marine Biological Laboratory, 7 MBL Street, Woods Hole, MA 02543 USA

<sup>2</sup> Laboratory of Physiology and Algorithms of the Brain, Leloir Institute (IIBBA-CONICET), Av. Patricias Argentinas 435, Buenos Aires, Argentina.

<sup>3</sup> Integrated Program in Neuroscience, McGill University, 845 Sherbrooke St W, Montreal, QC, Canada

<sup>4</sup> Montreal Neurological Institute and Hospital, McGill University, Montreal, QC, Canada

<sup>5</sup> Instituto de Ingeniería Eléctrica, Facultad de Ingeniería, Universidad de la República, 3RJM+898,

Montevideo, Uruguay

<sup>6</sup> School of Biological Sciences & Graduate Program in Quantitative Biosciences, Georgia Institute of Technology, Atlanta, GA, 30332 USA

<sup>7</sup> Champalimaud Neuroscience Programme; Champalimaud Foundation, Av. Brasília, Doca de Pedrouços, 1400-038 Lisbon, Portugal

<sup>8</sup> Bernstein Center for Computational Neuroscience, Humboldt University of Berlin, Philippstr. 13 Haus 6, 10115 Berlin, Germany

<sup>9</sup> University of Edinburgh, Simons Initiative for the Developing Brain, 1 George Square, EH8 9JZ, Edinburgh, Scotland, United Kingdom

Corresponding authors: MB & AC

Running Title: Wind whiskers

Keywords: barrel cortex, anemotaxis, whisker, supra-orbital vibrissa, biomechanics

## Abstract

**We know little about mammalian anemotaxis, wind-sensing. Recently, however, Hartmann and colleagues showed whisker-based anemotaxis in rats. This groundbreaking study prompted us to investigate how rat whiskers sense airflow. To this end, we tracked whisker tips in anesthetized or cadaver rats under no (shielded) airflow, low (ambient) airflow and high (fan-blowing) airflow conditions. Whisker tips showed little movement under no airflow conditions and all whisker tips moved during high airflow. Low airflow conditions – most similar to naturally occurring wind stimuli – engaged whisker tips differentially. While most facial whiskers showed little movement, the long supraorbital,  $\alpha$ , A1,  $\beta$ , and  $\gamma$  whiskers showed strong movements, with the long supraorbital whisker showing maximal displacement in low airflow. We mapped the cortical representation of the long supraorbital whiskers and found wind-sensitive-whisker barrels cluster in the posterolateral barrel map. Interestingly, the long supraorbital whisker differs from other whiskers in its exposed dorsal position, upward bending, length and thin diameter. *Ex vivo* extracted long supraorbital whiskers also showed exceptional airflow displacement, suggesting whisker-intrinsic biomechanics endow the supraorbital whisker with unique airflow sensitivity. To study the behavioral significance of whisker airflow responses we developed an airflow-sensing paradigm. We found that rats spontaneously turn towards weak (hand-flap) and strong (cardboard-flap) airflow stimuli in complete darkness. We then found selective trimming of wind-responsive whiskers diminished airflow turning responses more than trimming of non-wind-responsive whiskers. Lidocaine injections targeted to supraorbital whisker follicles also diminished airflow turning responses compared to control injections. We conclude that supraorbital whiskers act as wind antennae.**

## Significance statement

Animals rely on sensory processing of airflow in their environment (anemotaxis) to guide decisions related to navigation and survival. We examined the mechanisms of rat anemotaxis by combining whisker tracking, biomechanical analysis of whisker airflow responses, behavioral analysis of airflow turning and whisker interference by trimming and lidocaine injections. This diversity of methods led to a coherent pattern of results. Whiskers greatly differ in their airflow sensitivity and strongly wind-responsive whiskers – in particular the long supraorbital whiskers – determine behavioral responses to airflow stimuli in rats.

## Introduction

Animals can react to airflow stimuli and such wind-sensing abilities are referred to as anemotaxis. The best studied examples of such behaviors come from insects, where anemotactic turning has been studied amongst other species in crickets (Tauber & Camhi 1995; Landolfi & Miller 1995) and in *Drosophila* (Kalmus 1942; Jovanic et al 2019). Crickets show fast (Tauber & Camhi 1995), highly sensitive (Landolfi & Miller 1995) and directional escape responses to airflow stimuli. In *Drosophila*, the antennae are important transducers of anemotactic reactions (Suver et al. 2019). Until recently, little was known about the anemotactic abilities of mammals, but Hartmann and colleagues showed in 2016 (Yu et al 2016) in a conditioning paradigm that rats can sense airflow through tunnels. Deficits in airflow sensing after trimming of all whiskers then suggested that this form of airflow sensing is whisker-mediated. The same authors also characterized airflow mechanical responses of mystacial whiskers (Yu, Graff & Hartmann 2016) and responses of rat trigeminal ganglion cells to air flow stimuli (Yan, Bush & Hartmann 2019).

Our work was inspired by the whisker-anemotaxis shown by Hartmann & colleagues. Rather than focus on the five rows of mystacial whiskers, which are represented in the famous posteromedial-barrel-subfield (Woolsey & Van der Loos 1970), we decided to assess the role of all facial whiskers in anemotaxis. The decision to look across different whisker subfields was based on our experience that whisker subfields may have very different functional characteristics. The submandibular whisker trident, for example (The et al 2013), is a three-whisker-array involved in ground sensing. These whiskers appear to possess biomechanical specializations for ground sensing and may provide the animal with ego-motion-information about speed and heading direction (The et al. 2013, Chorev et al. 2016). While the mystacial macrovibrissae have been studied in detail, we know little about the other ~300 whiskers on a rat (Brecht 2007). These whiskers are organized in arrays (the upper and lower lip microvibrissae, the paw whiskers, etc.). The few studies on microvibrissae immediately suggested functional differences between macro- and microvibrissae at the behavioral level (Brecht et al. 1997; Anjum et al. 2006) and the level of cortical representation (Elston, Pow and Calford 1997).

The so-called supraorbital whiskers above the eye are – because of their exposed position – of obvious interest in wind sensing. Understanding of whisker function comes from understanding how whiskers interact in the environment (Grant et al. 2009, Jadhav and Feldman 2010). Our analysis of whisker diversity in wind sensing took advantage of recent progress in automated animal tracking, specifically of the DeepLabCut toolbox (Mathis et al. 2018; Mathis & Mathis 2020). We asked the following questions: (i) Which whiskers react maximally to airflow stimuli? (ii) Are whisker airflow responses dependent on whisker biomechanics? (iii) How do mechanical whisker airflow responses relate to the cortical barrel map? (iv) Can rats sense and localize airflow stimuli? (v) If yes, do whiskers contribute differentially to airflow sensitivity?

We find that whiskers differ markedly in their airflow responses. In particular, the supraorbital whiskers respond maximally when weak airflow stimuli are applied, and

such airflow responses reflect the specific whisker biomechanics of the supraorbital whiskers. Rats can sense and localize weak airflow stimuli and such abilities are diminished by selective whisker trimming of wind sensitive whiskers or by blocking supraorbital whiskers.

## **Materials and methods**

All experiments complied with regulations on animal welfare and were approved by ethics committees in Berlin, Germany and Woods Hole, USA (21-10C and 22-09E).

### *Whisker displacement*

Passive whisker movements were recorded in five rats (P19-P25), and a total of six videos were analyzed. Acquisition was performed with a Logitech BRIO, ultra-HD webcam at 60 frames per second (fps) (Logitech) under low-light conditions with fiber optic illumination of the facial whiskers. Airflow was directed towards the face and flow rate was controlled (passive flow and two variable fan speeds). Video tracking was performed using DeepLabCut (Mathis et al 2018).

### *Whisker morphology and biomechanics*

Two to four whiskers per whisker type from four rats (P19-P25; male=2, female=2) were plucked to measure the whiskers length and diameter. For length measurements we used an AVT Pike f421b camera with a 60mm Nikon macro lens. Images were acquired with Measurement and Automation Explorer by National Instruments. For the whisker base and tip, images were acquired using an upright epifluorescence Zeiss microscope (Zen software, blue edition) with brightfield (5X objective, Zeiss). Base diameter was measured in a transverse section close to the follicle, once the thickness of the initial segment of the whisker medullae reach a relatively constant thickness. Tip was measured at 95% of the total whisker length.

Two whiskers per whisker type from three rats (P19-P25; male=2, female=1) were plucked for the *ex vivo* assay (right side of the face). Whiskers were inserted by their base on clay in a linear array facing the same direction. Wind came mostly from the opposite direction of the resting curvature of the whiskers (see video 2). This was done to maximize whisker bending and to facilitate measurements, given that we observed the highest bending in this condition rather than when blowing wind in the same or perpendicular directions. To prevent wind from blowing directly towards the whiskers, we placed a plastic tube facing the whiskers 30 cm away from them with a fan placed on the distal end of the tube, away from the whiskers (the length of the tube was ~70 cm) and a loose paper towel on the proximal end of the tube, near the whiskers to attenuate wind intensity. The tube and the fan were approximately the same diameter (15 cm). Bending angle was reconstructed by superimposing two frames of a video where minimal and maximal deflection of the whisker was achieved. We used 75% of the total whisker length to trace a radius centered at the base of the whisker to calculate the bending angle. This procedure was repeated six times, once per whisker type. With this, we obtained twelve data points per whisker type. Images were acquired using a Logitech BRIO, ultra HD webcam (90 fps, Logitech).

### *Cortical localization of supraorbital whisker barrels*

Long Evans rats (P19-P25, n=4) were anesthetized using urethane (1.4 g/kg i.p.). Incised tissue was locally anesthetized with lidocaine. A rectal probe monitored body temperature, and a homeothermic blanket (FHC, Bowdoinham, ME, USA) maintained it at  $37 \pm 0.5^\circ\text{C}$ . For facial whisker barrel experiments, a craniotomy was made above the somatosensory cortex (3.5 mm posterior to Bregma; 6.5 mm lateral to Bregma). Broken glass electrodes filled with Ringer solution (NaCl 135, KCl 5.4, MgCl<sub>2</sub> 1, CaCl<sub>2</sub> 1.8, HEPES 5, in mM) were arranged to enter perpendicular to the cortex. Multi-unit activity was amplified using an Axoclamp 2B amplifier (Axon Instruments) and monitored (AM10 Grass Instruments) while moving in step coordinates centered around 6.3 mm posterior and 3.8 mm lateral to Bregma, and lightly moving the supraorbital whiskers.

#### *Histochemical visualization of barrel patterns*

The animals used for whisker mapping were deeply anesthetized and perfused transcardially with Ringer solution, followed by 4% paraformaldehyde (PFA). Brains were removed, hemispheres were separated and cortices were flattened between two glass slides separated by clay spacers. Glass slides were weighed down with small ceramic weights for about three hours. Afterwards, flattened cortices were stored overnight in 2% PFA and 80  $\mu\text{m}$  sections were cut on a vibratome. Sections were stained for cytochrome-oxidase activity using the protocol of Wong-Riley (1979). Subsequently, barrel shapes were drawn with NeuroLucida software (MicroBrightfield, Colchester, VT, USA) using a Zeiss Axioplan microscope fitted with a 10x and 2x objective.

#### *Wind-sensing behavior*

Long Evans rats (P21-P32, male=12; female=13) were separated from littermates prior to behavioral testing. Behavioral videos were recorded (Basler acA1920, 100 fps) in a darkened room with the inner chamber covered with blackout curtains. The behavior box was illuminated with an infrared LED lamp. Two experimenters were positioned on opposing ends of the testing box and prepared for tests with hands or flaps in position. The testing animal was then placed in the center of the chamber, and a third experimenter cued the experimental flapper by name in a random sequence every 10 seconds, with a total of 20 trials per session.

Whisker trimming or lidocaine/Ringer injections were performed in gently restrained animals under stereoscopic magnification and illumination within 10 minutes of behavior assessment. Injections were performed subcutaneously and directed to the area of origin for the supra-orbital whiskers. Wind-sensitive whiskers (2 supraorbital, the ear, A1,  $\alpha$ ,  $\beta$  and  $\gamma$  whiskers) or wind-insensitive whiskers (C2, C3, D2, D3, D4, E2 and E3) were trimmed with sharp scissors at the base of the skin without disturbing other whiskers. A day prior to the actual whisker trimming/lidocaine injections, the animals were habituated to the trimming/injection procedures in sham trimming/injection procedures in order to minimize stress on the day of the actual experiment. In such sham procedures, animals were gently restrained, positioned under the microscope and a pair of scissors was brought close to the animal's face.

### *Statistics*

Most of our dataset did not satisfy normality criteria, so we applied non-parametric statistics. We analyzed data from binomial distributions with  $\chi^2$  and Fisher's exact test. Mann-Whitney, Wilcoxon or Kruskal-Wallis test were employed to analyze two unpaired groups, two paired groups or more than two unpaired groups, respectively. Post hoc analysis was carried out using Dunn's test. Data was expressed as the root mean square (RMS) or the mean  $\pm$  the standard error of the mean (SEM) RMS values were compared using a non-parametric one-way ANOVA . We only report differences which were significant and relevant to the experiment. In all cases  $p < 0.05$  was the statistical threshold. The analyses were done using Python 3.7 or MATLAB (MathWorks, Natick, MA).

## Results

### Differential whisker displacement by airflow

As a first step of our analysis, we assessed the passive displacement of whiskers by wind stimuli. To this end, we filmed five heads of either deeply urethane-anesthetized ( $n = 3$ ) or cadaver ( $n = 2$ ) rats under a variety of wind conditions. In four of the heads, whisker tips with annotated whisker identity were tracked using DeepLabCut (Nath et al, 2019, see also Movie 1). An attempt was made to identify and track a large number ( $> 10$ ) of whiskers in all animals. Accordingly, we labeled several easily identifiable whiskers, such as the long supraorbitals (ISO), short supraorbitals (sSO), A-row whiskers, alpha, beta, gamma, and caudal whiskers of the B and C rows (Figure 1A). We recorded videos of rats while under no wind, ambient (low wind) and fan-blowing (high wind) conditions, and examined the X- and Y- displacements of each whisker during the three conditions. Whisker movement was minimal in the no wind condition (Figure 1B), while most whiskers moved in the high wind condition (Figure 1D). Interestingly, we found that during the low wind condition, only specific whiskers showed marked displacement compared to the others; these were the long whiskers, predominantly the ISO, A1 and  $\alpha$  whiskers (Figure 1C, arrows). We further computed the velocity of the whisker displacement (Figure 1E, F), and found maximal deflections of the long whiskers (ISO, A1,  $\alpha$ ). We computed the root mean square (RMS) velocity for low wind condition recordings made from 4 animals and found a consistent trend of highest RMS velocity deflection for the long whiskers (Figure 1G). In all four video sequences that we analyzed quantitatively we observed highly significant differences in the amount of whisker displacement (measured by RMS of velocity) across whiskers (see Figure 1F). While the details of whisker displacements differed across video sequences, the two aspects were the same: (i) ISO, A1,  $\alpha$  whiskers as well as closely neighboring whiskers always showed big displacements; (ii) anterior and middle whiskers of the C and, D rows and always showed little airflow induced displacements. These aspects are also captured in our across movies analysis (Figure 1G). In addition to the quantitatively analyzed movies shown in Figure 1, we also inspected a variety of additional rat head movies qualitatively. These movies included videos of head side views and movies of upside-down heads. All of these recordings led to similar qualitative conclusions. Notably, in all of our experiments, the ISO showed very strong and usually the maximal deflection, prompting us to further examine the function of the ISO in detail with regards to anemotaxis in rats.

### Differential whisker biomechanics determine airflow responses

We wondered how the differential responses of whiskers to airflow arise. To address this question, we first visually inspected whiskers with differing airflow responses. Differential characteristics were readily visible and immediately noted that the ISO whisker was unusually thin for its length (Figure 2A). Such differences were confirmed when we acquired micrographs of full whiskers (Figure 2B left) and their shafts (Figure 2B right). We further characterized the detailed characteristics by plucking some wind-



responsive and non-wind-responsive whiskers. Total whisker length, base and tip diameters were measured in wind and non-wind-engaged whiskers (Table 1; Figure 2C). We computed the Spearman's rank correlation coefficient to examine the relationship between whisker length and base diameter, and found a positive correlation between the two variables [ $r(26) = 0.88, p = 3.5 \times 10^{-10}$ ] (Figure 2C). ISO whiskers were relatively thin and short amongst the long whiskers (ISO, A1, B1, E1,  $\alpha$ ,  $\delta$ ) but display a clear difference with respect to the small supraorbital and the shorter whiskers (sSO, A4, B4). Interestingly, whisker tip diameters of all whiskers were quite similar to each other. (Table 1). This result suggests that optimal wind-engaging (ISO and A1, as observed in our *in vivo* assay) occurs within a length-base diameter range. To test if whisker biomechanics are indeed sufficient to determine differential airflow responses, we performed *ex vivo* experiments on extracted whiskers (Figure 2D). To this end, we inserted the base of a similar sample of wind and non-wind-engaged whiskers in clay on a linear array with similar orientation. We calculated the maximal bending of the whiskers during low wind flow with respect to the curvature at rest and took the bending angle (Figure 2D–E; see methods). A Kruskal-Wallis test on whisker type showed a significant effect [ $H(5, 42) = 36.45, p < 0.0001$ ]. Dunn's post-hoc test indicated that only comparisons involving ISO and A1 whiskers yielded significant differences. Particularly, bending angle of ISO significantly differs from every other whisker (all  $p$ -values  $< 0.02$ ) except A1, which was another wind sensitive whisker found in our previous *in vivo* assay. A1 differed from C3 and E1 ( $p$  values  $< 0.01$ ). Taken together, our results identify whisker biomechanics as crucial determinants of airflow responses.

### **Mapping of supra-orbital whisker barrels and relation of whisker airflow displacement to the cortical barrel map**

The differential mechanical airflow responses of whiskers point towards a role of the supraorbital whiskers in airflow sensing. We therefore mapped the location of cortical barrels representing the supraorbital whiskers in extracellular receptive field mapping experiments and prepared cytochrome oxidase sections of layer 4 of the barrel cortex (Figure 3A). We consistently (in four out of four mapping experiments) observed supraorbital whisker responses in brain regions posterior to the A1 and  $\alpha$  whisker response areas. Also, the stereotaxic coordinates of supraorbital whiskers were highly consistent ( $6.26 \pm 0.01$  mm lateral and  $3.75 \pm 0.20$  mm posterior to bregma, mean  $\pm$  standard error of the mean). These observations led us to a suggestion for the location of the supraorbital whisker barrels in relation to the rest of the barrel field (Figure 3B). Next, we wondered how mechanical airflow responsiveness relates to the cortical barrel field and we color coded it and superimposed to the barrel map (Figure 3C). Quantitative tracking data for whisker displacement was not available for all whiskers (hence the empty barrels), but it was nonetheless clear that wind-responsive whiskers (with large air flow displacements) cluster in the posterolateral barrel map.

We also inspected the putative supraorbital whisker barrels in many ( $n = 10$ ) additional barrel maps that we derived for other purposes in previous studies (Lenschow et al 2016; Lenschow, Sigl-Glöckner, & Brecht 2017). We made the following observations: (i) the exact position and orientation of putative supraorbital whisker barrels relative to

the posteromedial-barrel-subfield is somewhat variable and more variable relative to the position and orientation of the mystacial barrels to each other. (ii) Putative supraorbital whisker barrels are elongated. (iii) Putative supraorbital whisker barrels are always close (see also Figure 3A–B). (iv) The septum separating putative supraorbital whisker barrels is weaker than the septum separating mystacial barrels (see also Figure 3 A–B).

The latter two observations support the idea that the short and long supraorbital whiskers are functionally related.

### **Anemotaxic turning in rats**

To assess the behavioral capacities for wind-sensing in rats, we developed an airflow sensing paradigm. To this end, we placed a rat in a box with three compartments separated by wire-mesh in total darkness, i.e., the box was shielded in a rack with dark curtains and additionally experiments were conducted in a darkened room. Videos were acquired using an infrared (IR) light and an IR camera, both positioned above the experimental box. The rats were placed in the middle compartment and two experimenters performed repetitive hand-flaps, in either one of the two lateral compartments (Figure 3A, see also Movie 3). The reactions of rats to hand-flap stimuli (presented randomly every 10 seconds on either side of the box) were assigned by forced choice to one of three categories: either no reaction or turning towards the stimulus or turning away from the stimulus. (Figure 3B, Movie 3). Even though rats often showed no reaction, when they did, the animals appeared to be able to distinguish the side where the hand-flap was delivered. Accordingly, rats turn significantly more often towards hand-flaps than away from them (Fig. 3B;  $p < 0.001$ ,  $\chi^2$  Test; ‘Turn to’ (31 trials) vs ‘Turn away’ (7 trials)). Next, we wanted to compare the rats’ reactions to different wind stimuli. Using the same behavioral paradigm, we changed the wind delivering method by flapping a cardboard piece, which evokes a more powerful airflow than the hand-flap (Fig. 3C, Movie 3). Again, the animals consistently showed a higher percentage of responses towards the stimuli side when compared to turning away responses (Fig. 3D;  $p < 0.001$ ,  $\chi^2$  Test). Strikingly, when comparing the ‘Turn to’ responses in the two wind delivery methods, we observed a stronger reactivity of the animals to cardboard-flap than to hand-flap stimuli (Fig. 3C, D;  $p = 0.0036$ , Fisher’s Exact Test). Our results show that rats can not only sense, but also turn to airflow stimuli. The strength of the reactions differed between weak (hand-flap) and strong (cardboard-flap) stimuli. Since we carefully avoided noises associated to hand-flap or cardboard-flap stimuli and conducted experiments in total darkness, it is likely that animals indeed sensed airflow. The whisker trimming and lidocaine injection effects described below show the turning responses observed were indeed at least partially if not entirely tactile reactions.

### **Wind-whisker trimming and supra-orbital whisker blockade interfere with airflow turning responses**

Wind-responsive whiskers (2 supraorbitals, ear, A1,  $\alpha$ ,  $\beta$  and  $\gamma$  whiskers), as identified in our whisker tracking experiments, were trimmed in 7 rats (Figure 5A). A subset of

wind-insensitive whiskers (C2, C3, D2, D3, D4, E2 and E3) were trimmed in 7 different rats, which had their wind-responsive whiskers intact (Figure 5B). Both sets of individuals were then submitted to cardboard-flap stimuli in complete darkness and were filmed (Figure 5C), as described in the previous section. Out of 20 trials, we counted each individual's number of turns towards the stimulus. We found that on average, wind-whisker-trimmed individuals turned towards the stimulus 20% of the time, while non-wind-whisker-trimmed individuals turned towards the stimulus 29% of the time ( $p=0.02$ , Figure 5D). Thus, removal of wind-responsive whiskers resulted in a stronger decrease in turning behavior than the removal of wind-insensitive whiskers.

We next asked if supraorbital whiskers alone play a role in wind-induced turning. To investigate this, we injected 8 individuals with either lidocaine or Ringer solution (as a negative control) locally at their supraorbital whisker follicles and followed this with an injection of the respective other solution 24 hours later (Figure 5E). After each injection, we subjected the animals to the cardboard-flap tests, as illustrated in Figure 5C. Therefore, we have 8 paired trials for each condition. Seven out of eight individuals showed a decrease in turning behavior for lidocaine when compared with Ringer solution (Figure 5F). The average turns towards the cardboard-flap stimulus were less frequent (18%) for lidocaine treatment than for Ringer treatment (23%,  $p=0.039$ ). We conclude that supraorbital whiskers alone contribute significantly to airflow turning responses.

## **Discussion**

### **Summary**

We studied rat anemotaxis by combining whisker tracking, biomechanical analysis of whisker airflow responses, behavioral analysis of airflow turning and whisker interference by trimming and lidocaine injections. This diversity of methods led to a coherent pattern of results. Whiskers greatly differ in their airflow sensitivity and strongly wind-responsive whiskers – in particular the long supraorbital whiskers – determine behavioral responses to airflow stimuli in rats.

### **Differential sensitivity of rat whiskers to airflow**

Whisker tracking of large numbers of whiskers (>10) under a variety of airflow conditions suggested differential sensitivity of rat whiskers to airflow. The sheer amount of data acquired here reflects the power of tracking software such as DeepLabCut (Mathis et al. 2018; Mathis & Mathis 2020) without which our analysis would not have been possible. The patterns of whisker airflow displacement were remarkably consistent across experiments. First, no airflow (shielded) conditions largely abolished whisker displacement in anesthetized and cadaver animals, showing that it is indeed airflow that leads to whisker tip displacement. Second, we found that strong airflow displaces all whiskers. Third, low airflow conditions lead to a differential engagement of whisker tips, with some whiskers (in particular the supraorbitals) showing strong movements. The ‘low’ airflow conditions studied here included simply ambient airflow in a room with air conditioning or – in a closet – the turning on of a fan that was not directly aimed towards the whiskers. We realize that such airflow conditions are not strictly controlled, but they provided nonetheless the most interesting results, namely very strong whisker displacements in some whiskers (but not others), when one ‘feels’ barely any or no wind. Data on more controlled airflow whisker displacements were gathered by Yu, Graff & Hartmann (2016). We think both controlled airflow whisker displacements as pioneered by Yu, Graff & Hartmann (2016) and the study of ambient naturalistic airflow as done here provide information about whisker airflow responses.

Our biomechanical analysis enforced the idea of a differential whisker sensitivity to airflow. First, we found that strongly airflow responsive whiskers such as the supraorbital and the A1 whiskers are very thin. Second and more interestingly, even the extracted long supraorbital whisker shows exceptionally strong airflow responses. A synopsis of our observations points towards biomechanical specializations that endow the supraorbital whiskers with strong airflow responsiveness.

### **Rat anemotaxis**

Previous work by Yu et al. (2016) established the ability of rats to sense windblown through tunnels. These abilities were diminished by trimming all facial whiskers (Yu et al. 2016). Our current work extends our knowledge of rat anemotactic abilities. We demonstrate that rats show robust turning responses to both weak (hand-flaps) and strong (cardboard-flaps) airflow stimuli. Such turning responses show that rats can not

only detect but also localize airflow stimuli. The task conditions (total darkness, no contact/little or no audible sounds) and the diminished airflow responsiveness after whisker trimming or blockade clearly indicate that tactile stimuli induce anemotaxic turning. At least for the hand-flap, the evoked airflow currents – which the animals detect in distances of 10cm or more – appeared to be quite small. Since a hand-flap is not categorically different from airflows induced by biologically relevant stimuli (such as a predator), we think such anemotaxic sensing might offer real-world advantages to nocturnal animals like rats. With the exception of the fact that rats turn towards rather than away from hand-flap stimuli, our observations remind us of anemotaxic escape behaviors as they have been described in insects. Indeed, we wonder if the rat's anemotaxic turning observed by us is also a defensive behavior that guards the animal against surprise attacks from the side or behind. The idea that supraorbital, A1 and  $\alpha$  whiskers mediate defensive behaviors matches with their representation in the medial superior colliculus (Dräger & Hubel 1975), where both visual (Yilmaz & Meister 2013) and electric stimulation (Dean, Redgrave & Westby 1991) evoke defensive behaviors such as escape and freezing.

Independent of exact purpose and the underlying neural circuits, we find that anemotaxic turning is an extremely valuable behavioral assay for wind-sensing in rats. As it requires no prior conditioning, the robustness of the behavior allowed us to screen wind-sensing abilities in large numbers (> 20) of rats.

### **The supraorbital whiskers as wind antennae**

The central conclusion from our work is that whiskers differ in their sensitivity to airflow stimuli. Specifically, the supraorbital whiskers emerged as key sensors for wind stimuli from our analysis. These whiskers show maximal displacement to weak airflow stimuli, a response property that – according to *ex vivo* experiments – reflects the unique biomechanical properties of these whiskers. The very dorsal position, and the upward bending very likely further enhances airflow sensitivity. At least in mice, supraorbital whiskers appear to be actively whisked together with the mystacial whiskers (Severson et al. 2019). The two supraorbital whiskers are represented in two closely adjacent cortical barrels. Both whisker trimming and most of all the effects of lidocaine injections document the functional significance of supraorbital whiskers for airflow sensing. The reduction of anemotaxic turning after supraorbital lidocaine injections is a remarkable result, given that these bilateral injections targeted only 4 out of the roughly 300 rat whiskers.

### **Conclusion**

Our data adds to the growing evidence that the functional diversity of whiskers enriches the rat's sensory world (Diamond et al. 2008, Szwed et al 2003). The much-studied mystacial macrovibrissae seem to serve many functions, the microvibrissae mediate object contacts, trident whiskers engage in ground sensing and supraorbital whiskers – according to several lines of evidence provided here – act as wind whiskers.

## References

Anjum F, Turni H, Mulder PG, van der Burg J, Brecht M (2006) Tactile guidance of prey capture in Etruscan shrews. *Proc Natl Acad Sci U S A* 103: 16544-16549.

Brecht M, Preilowski B, Merzenich MM (1997) Functional architecture of the mystacial vibrissae. *Behavioural Brain Research* 84: 81-97.

Brecht M (2007) Barrel cortex and whisker-mediated behaviors. *Current Opinion Neurobiology* 17: 408-16.

Chapin JK, Lin CS (1984) Mapping the body representation in the SI cortex of anesthetized and awake rats. *J Comp Neurol* 229:199-213.

Chorev, E., Preston-Ferrer, P., & Brecht, M. (2016). Representation of egomotion in rat's trident and E-row whisker cortices. *Nature neuroscience*, 19(10), 1367-1373.

Dean, P., Redgrave, P., & Westby, G. M. (1989). Event or emergency? Two response systems in the mammalian superior colliculus. *Trends in neurosciences*, 12(4), 137-147.

Diamond, Mathew E., et al. "'Where'and'what'in the whisker sensorimotor system." *Nature Reviews Neuroscience* 9.8 (2008): 601-612.

Dräger, U. C., & Hubel, D. H. (1975). Responses to visual stimulation and relationship between visual, auditory, and somatosensory inputs in mouse superior colliculus. *Journal of Neurophysiology*, 38(3), 690-713.

Elston GN, Pow DV, Calford MB (1997) Neuronal composition and morphology in layer IV of two vibrissal barrel subfields of rat cortex. *Cerebral Cortex* 7:422–431.

Grant, R. A., Mitchinson, B., Fox, C. W., & Prescott, T. J. (2009). Active touch sensing in the rat: anticipatory and regulatory control of whisker movements during surface exploration. *Journal of neurophysiology*, 101(2), 862-874

Jadhav, Shantanu P., and Daniel E. Feldman. "Texture coding in the whisker system." *Current opinion in neurobiology* 20.3 (2010): 313-318.

Jovanic, T., Winding, M., Cardona, A., Truman, J. W., Gershow, M., & Zlatic, M. (2019). Neural substrates of *Drosophila* larval anemotaxis. *Current Biology*, 29(4), 554-566.

Kalmus, H. (1942). Anemotaxis in *Drosophila*. *Nature*, 150 (3805), 405-405.

Landolf, M. A., & Miller, J. P. (1995). Stimulus-response properties of cricket cereal filiform receptors. *Journal of Comparative Physiology A*, 177(6), 749-757.

Lenschow, C., Copley, S., Gardiner, J. M., Talbot, Z. N., Vitenzon, A., & Brecht, M. (2016). Sexually monomorphic maps and dimorphic responses in rat genital cortex. *Current Biology*, 26(1), 106-113.

Lenschow, C., Sigl-Glöckner, J., & Brecht, M. (2017). Development of rat female genital cortex and control of female puberty by sexual touch. *PLoS biology*, 15(9), e2001283.

Mathis, A., Mamidanna, P., Cury, K. M., Abe, T., Murthy, V. N., Mathis, M. W., & Bethge, M. (2018). DeepLabCut: markerless pose estimation of user-defined body parts with deep learning. *Nature neuroscience*, 21(9), 1281-1289.

Mathis, Mackenzie Weygandt, and Alexander Mathis. "Deep learning tools for the measurement of animal behavior in neuroscience." *Current opinion in neurobiology* 60 (2020): 1-11.

Nath, T., Mathis, A., Chen, A. C., Patel, A., Bethge, M., & Mathis, M. W. (2019). Using DeepLabCut for 3D markerless pose estimation across species and behaviors. *Nature protocols*, 14(7), 2152-2176.

Severson, K. S., Xu, D., Yang, H., & O'Connor, D. H. (2019). Coding of whisker motion across the mouse face. *Elife*, 8, e41535.

Suver, M. P., Matheson, A. M., Sarkar, S., Damiata, M., Schoppik, D., & Nagel, K. I. (2019). Encoding of wind direction by central neurons in *Drosophila*. *Neuron*, 102(4), 828-842.

Szwed M, Bagdasarian K, Ahissar E (2003) Encoding of Vibrissal Active Touch. *Neuron* 40:621–630.

Tauber, E. R. A. N., & Camhi, J. (1995). The wind-evoked escape behavior of the cricket *Gryllus bimaculatus*: integration of behavioral elements. *The Journal of experimental biology*, 198(9), 1895-1907.

Thé L, Wallace ML, Chen CH, Chorev E, Brecht M (2013) Structure, function, and cortical representation of the rat submandibular whisker trident. *J Neurosci* 33(11):4815-24.

Woolsey TA, Van Der Loos H (1970) The structural organization of layer IV in the somatosensory region (SI) of mouse cerebral cortex. The description of a cortical field composed of discrete cytoarchitectonic units. *Brain Research* 17:205–242.

Yan, S. W., Bush, N. E., & Hartmann, M. J. (2019). Whisker vibrations and the activity of trigeminal primary afferents in response to airflow. *Journal of Neuroscience*, 39(30), 5881-5896.

Yilmaz, M., & Meister, M. (2013). Rapid innate defensive responses of mice to looming visual stimuli. *Current Biology*, 23(20), 2011-2015.

Yu, Y. S., Graff, M. M., Bresee, C. S., Man, Y. B., & Hartmann, M. J. (2016). Whiskers aid anemotaxis in rats. *Science Advances*, 2(8), e1600716.

Yu, Y. S., Graff, M. M., & Hartmann, M. J. (2016). Mechanical responses of rat vibrissae to airflow. *Journal of Experimental Biology*, 219(7), 937-948.



**Acknowledgements:**

This work was supported by the Marine Biological Laboratory, a training grant from the NIMH (R25MH059472), Humboldt Universität zu Berlin, the Bernstein Center for Computational Neuroscience Berlin, the German federal ministry of education and research. Ann Clemens is supported by the Simons Initiative for the Developing Brain, the University of Edinburgh and a Simons Edinburgh Scientific Academic Track (Simons- ESAT) fellowship. Ana Rita Mendes and Dhruv Mehrotra were supported by The Grass Foundation to attend the Neural Systems & Behavior Course (NS&B). Federico Davoine was supported by the Stanley W. Watson Education Fund to attend NS&B. Matías Mugnaini was supported by an IBRO-USCRC Fellowship to attend NS&B. We thank Alberto Pereda, Stephanie White, Rosalie Maltby, Rose Holzhauser, Juliana Rhee, Duncan Leitch and the Neural Systems & Behavior folks.

Figures

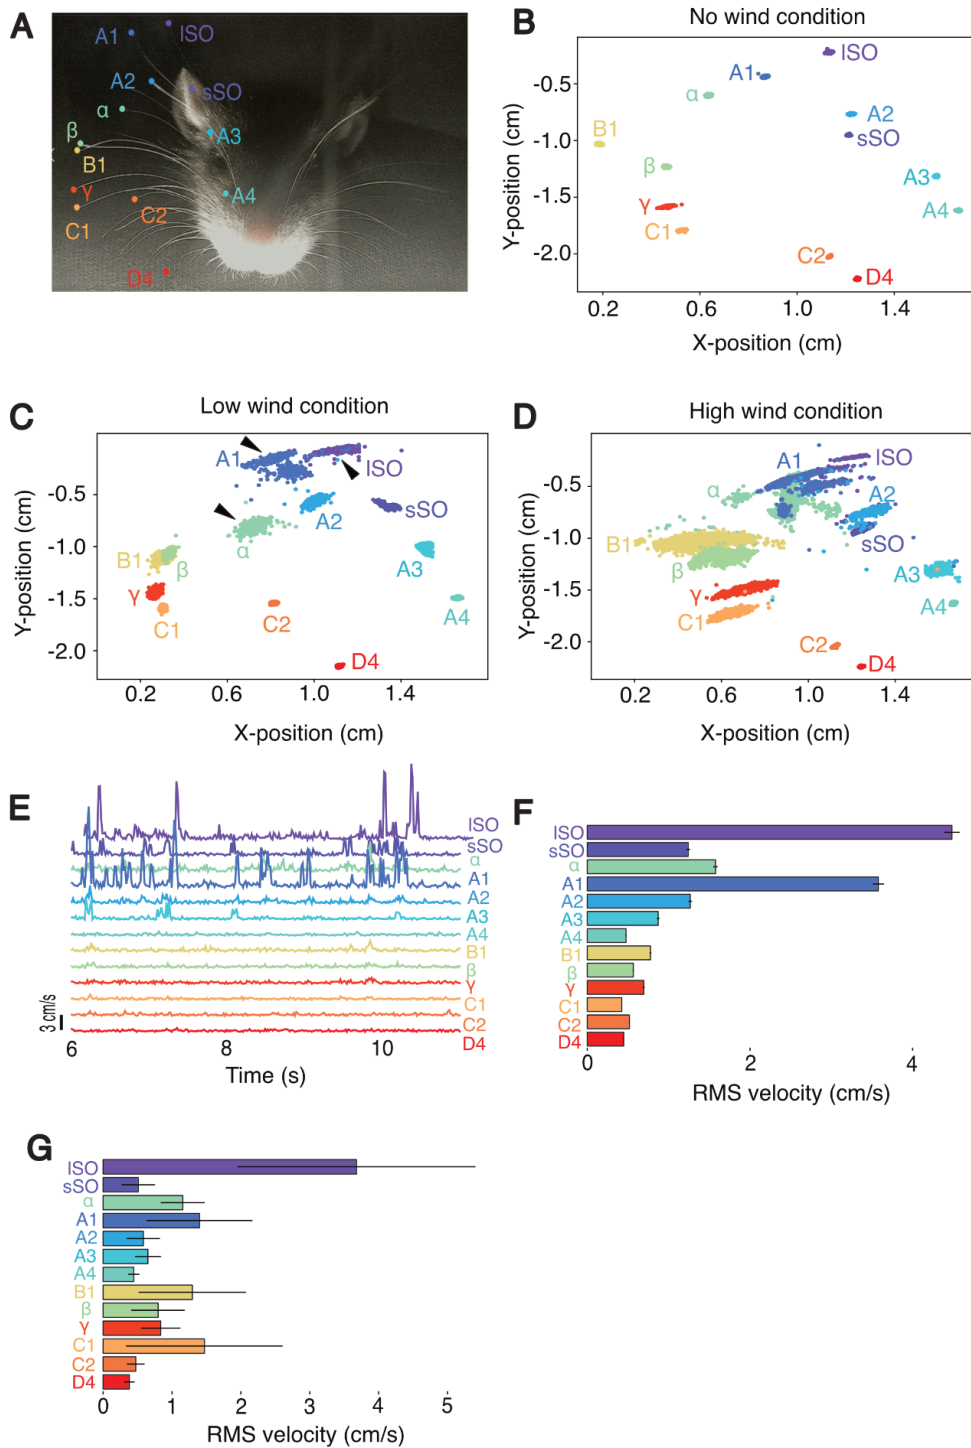

**Figure 1. Differential displacement of rat whiskers responses to air flow**

**A**, Head of a deeply anesthetized rat with whisker tips tracked by DeepLabCut. (See also Movie 1).

**B**, Tracked X- and Y-coordinates of whisker tips under no airflow conditions, i.e., when the rat head was filmed in a small (ca. 1.5 m<sup>2</sup>) locked closet. Whiskers are stationary during the no wind condition.

**C**, Tracked X- and Y-coordinates of whisker tips under low airflow conditions, i.e., when the rat head was filmed in a small (ca. 1.5 m<sup>2</sup>) closet with fan turned on at its lowest speed, and was directed away from the head. Whiskers are stationary during the no-wind condition. Note the selective deflection of long supraorbital (ISO), A1 and  $\alpha$  whiskers (black arrows) during the low wind condition.

**D**, Tracked X- and Y-coordinates of whisker tips under high airflow conditions, i.e. when the rat head was filmed with the fan directed to the head.

**(E)**, Example velocity traces for all labeled whiskers during the low wind condition shown in **(C)**.

**(F)**, Root mean square (RMS) velocity  $\pm$  SEM for all tracked whiskers in the low wind condition shown in **(C)**. Differences in RMS values across whiskers were statistically highly significant ( $p < 0.000001$ ; non-parametric one-way ANOVA).

**(G)** RMS velocity  $\pm$  SEM across several animals ( $n = 4$  animals), shows consistent deflection of the ISO in low wind conditions.

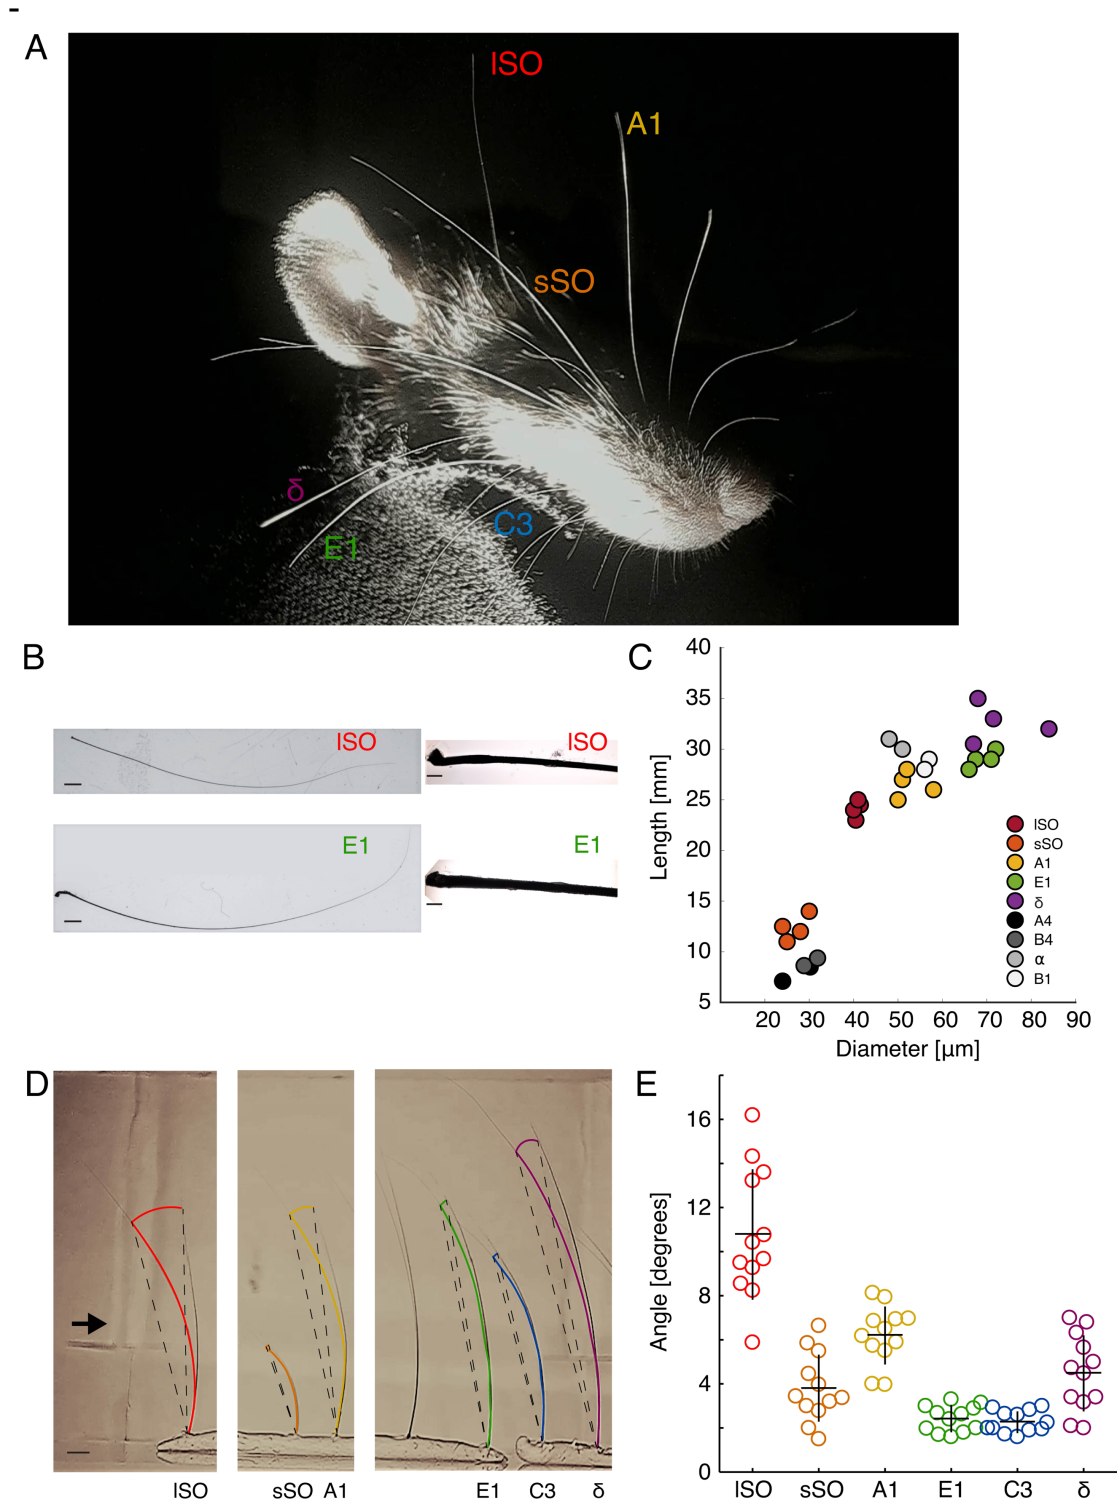

**Figure 2. Differential biomechanics determine rat whiskers air flow responses**

**A**, Head of a deeply anesthetized rat. Note the thin whisker diameter of the long supra-orbital (ISO) whisker.

**B**, Photograph of ISO and E1 whiskers (left). Scale 1 mm. Micrograph of the initial segments of ISO and E1 whiskers (right). Scale 100  $\mu\text{m}$ .

**C**, Whisker length plotted against whisker base diameter for long (ISO, A1, E1,  $\delta$ ) and short (sSO, A4, B4) whiskers.

**D**, Whisker bending while blowing wind onto extracted whiskers *ex vivo*. Bending angle was reconstructed by superimposing two frames of a video where minimal (rest, left) and maximal (full deflection, right) deflection in one whisker was achieved. In this picture, maximal ISO bending is shown. Color coded curves were drawn to fit 75% of the total whisker length. This partial length was employed to trace a radius (dashed lines) centered at the base of the whisker to calculate the bending angle. Approximate wind direction (black arrow). Scale 2 mm (black line, bottom left).

**E**, Bending angle for each whisker type (color coded). Each dot represents the deflection that a given whisker reached when itself or other whisker type reached its maximal bending. Kruskal-Wallis test on whisker type [ $H(5, 42) = 36.45, p < 0.0001$ ]. Dunn's post-hoc test indicated that the ISO bending angle significantly differed from every other whisker (All  $p_s < 0.02$ ) except from A1. Meanwhile, A1 differed from C3 and E1 ( $p_s < 0.01$ ). Black crosses indicate the mean and standard error.

See also Movie 2.

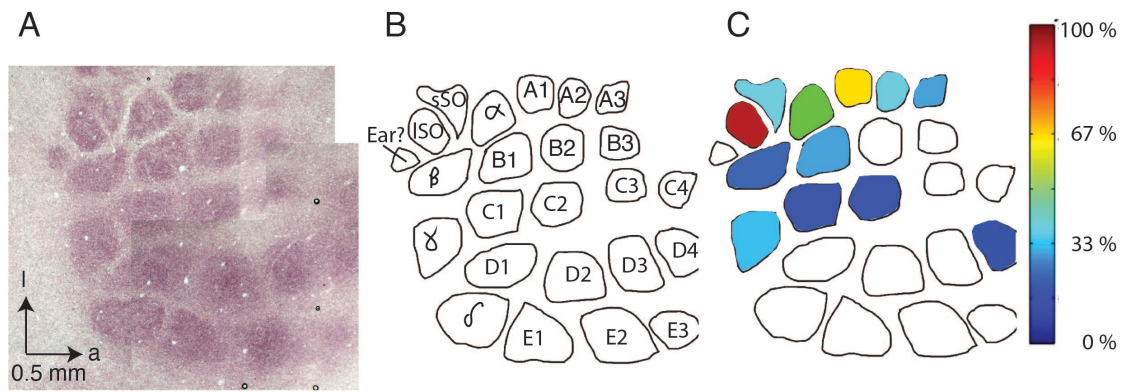

**Figure 3. Localization of supraorbital whisker barrels and relation of whisker airflow displacement to the cortical barrel map**

**A**, Cortical barrels in a tangential section through layer 4 of rat barrel cortex revealed staining for cytochrome oxidase reactivity; dark brown color indicates high reactivity. a = anterior, l = lateral.

**B**, Drawing of cortical barrels (from **A**) with the positions of supraorbital whisker barrels. Short (sSO) and long (ISO) supraorbital whisker barrels were identified in four receptive field mapping experiments, in all cases posterior rather than lateral to  $\alpha$ /A1 whisker responses. Note that some anterior barrels (A4 and B4) and microvibrissae barrels are missing due to sectioning.

**C**, Whisker displacement under low airflow conditions was quantified, normalized to the maximal response, color coded and superimposed to the barrel map drawn in **B**. The data come from an airflow whisker displacement experiment on the head of the anesthetized animal analogous to the data shown in Figure 1F. Quantitative tracking data for whisker displacement were not available for all whiskers (hence the empty barrels). Qualitative assessment of D- and E-row whiskers suggested they show little air flow whisker displacement similar to the data of whisker D4 (also see Movie 1). Wind-responsive whiskers (with large airflow displacements) cluster in the posterolateral barrel map.

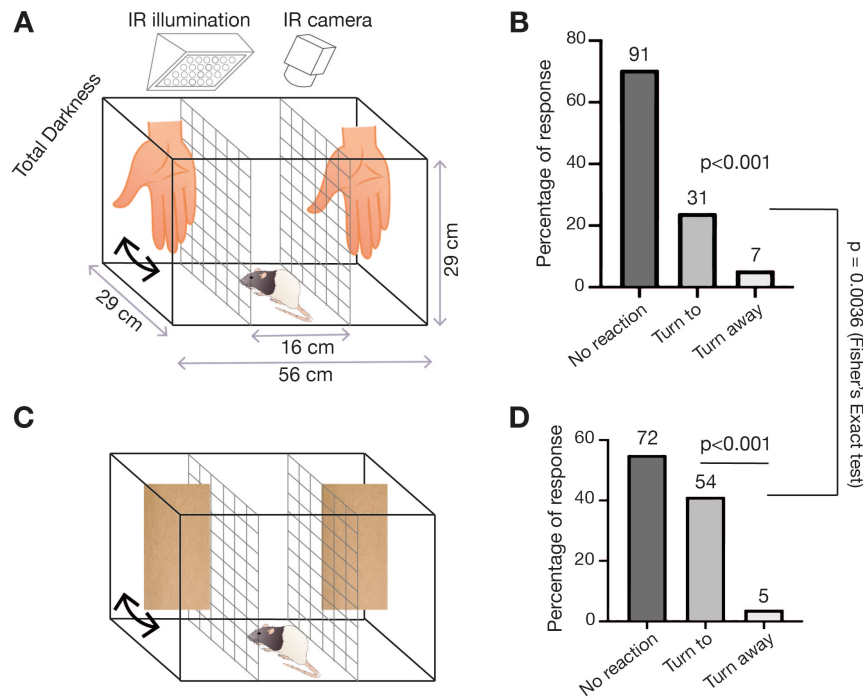

#### Figure 4. Anemotaxic turning in rats

**A**, The turning behavior arena is split into 3 sections separated by wire-mesh. The rat is placed in the middle compartment and airflow stimuli is applied by hand-flap in the left and right compartments. Left and right hand-flap stimuli were randomized and separated by 10 seconds each. The arena was illuminated with infrared light and filmed with an infrared-sensitive camera in total darkness.

**B**, Behavioral responses of rats ( $n = 7$ ) to hand-movement stimuli (0.5 seconds post stimulus) were assigned by forced choice to one of three categories: either no reaction or turning towards the stimulus or turning away from the stimulus. Rats were strongly biased to turn towards the hand-movement stimuli ( $p < 0.001$ ,  $\chi^2$  Test).

**C**, Cardboard-flaps are used to apply stronger airflow stimuli than the hand-flaps; the stimulation protocol is as in **A**.

**D**, Seven rats react to cardboard-flap movement stimuli from (C), scoring is done as in **B**. Rats were strongly biased to turn towards the hand-flap stimuli ( $p < 0.001$ ,  $\chi^2$  Test). Rats turn towards cardboard-flaps more frequently than to hand-flaps ( $p = 0.0036$ , Fisher's Exact Test).

See also Movie 3.

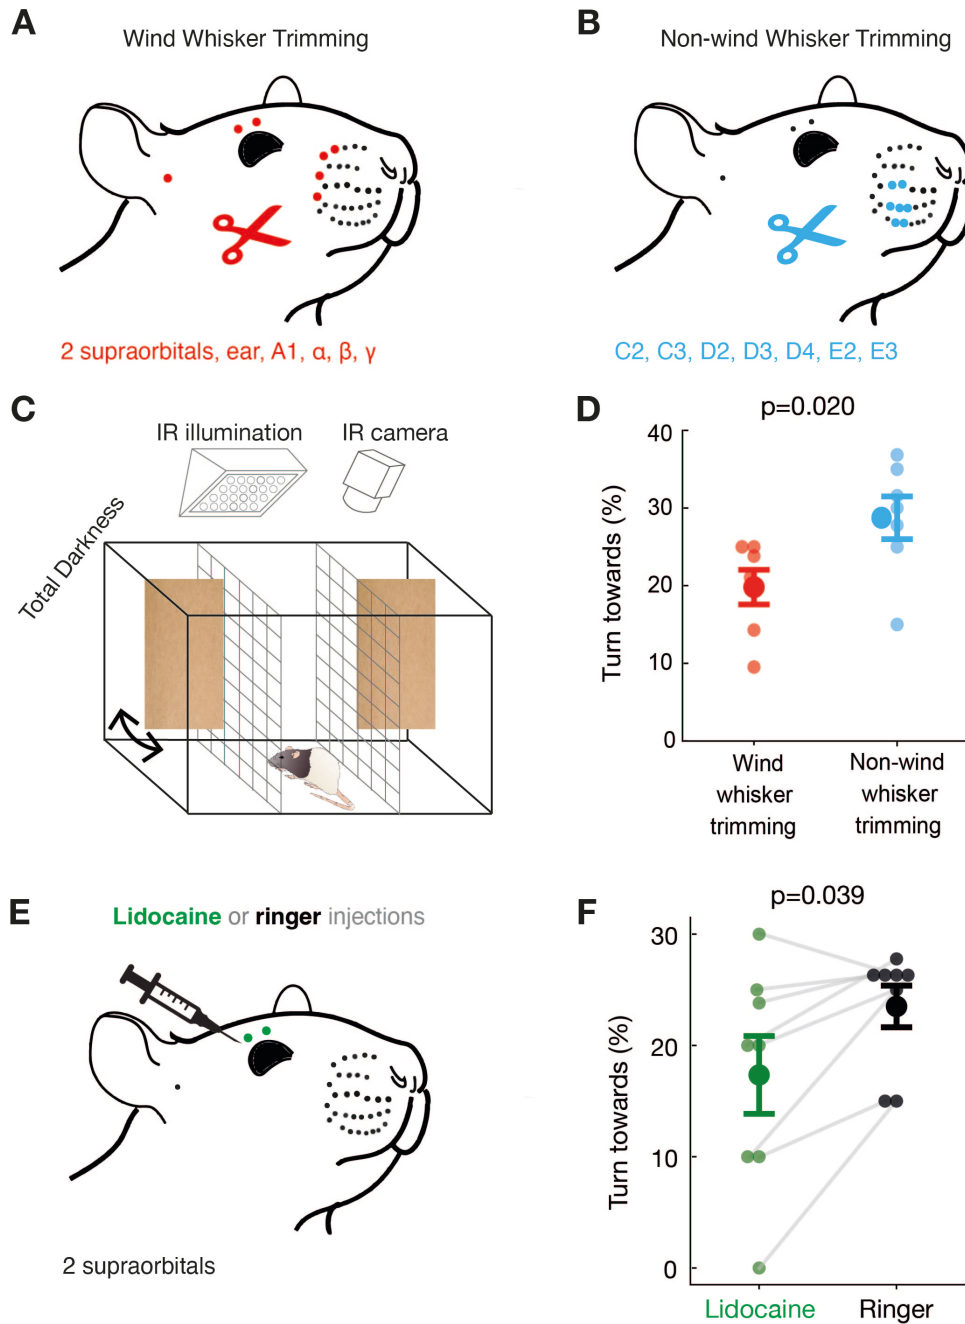

**Figure 5. Differential effects of wind-whisker trimming and supraorbital nerve blockade on rat airflow turning responses**

**A**, Wind-sensitive whiskers (2 supraorbital, ear, A1,  $\alpha$ ,  $\beta$ ,  $\gamma$  whiskers) were trimmed in 7 rats.

**B**, Wind-insensitive whiskers (C2, C3, D2, D3, D4, E2 and E3) were trimmed in another 7 rats.

**C**, Cardboard-flaps were used to deliver wind stimuli in the turning-behavior arena, each trial being separated by 10 seconds and at randomized positions; see Figure 4C.

**D**, Wind-whisker-trimmed animals (red) turn towards flaps less strongly ( $p=0.039$ , unpaired Mann-Whitney-U-test, two-tailed,  $N=7$  animals) than non-wind-whisker-trimmed animals (blue).



**E**, The supraorbital whisker follicles were targeted with lidocaine (green) or Ringer solution (gray) in 8 individuals in a paired procedure.

**F**, Lidocaine in supraorbital whiskers (green) significantly decreased airflow turning responses relative to Ringer injection ( $p = 0.02$ ; Wilcoxon signed-rank test, two-tailed,  $N = 8$  animals, 20 trials each).

**Table 1** - Whisker properties

Each row refers to an individual whisker; data from P25-P32 rats.

|          | Length(mm) | Diameter base (um) | Diameter tip (um) |
|----------|------------|--------------------|-------------------|
| ISO      | 23         | 40                 | 5                 |
|          | 24         | 41                 | 7                 |
|          | 24         | 40                 | 4                 |
|          | 25         | 41                 | 5                 |
| sSO      | 11         | 25                 | 4                 |
|          | 12         | 28                 | 5                 |
|          | 14         | 30                 | 4                 |
| $\delta$ | 12         | 24                 | 6                 |
|          | 35         | 68                 | 7                 |
|          | 30         | 67                 | 15                |
|          | 32         | 84                 | 7                 |
| E1       | 33         | 71                 | 8                 |
|          | 29         | 67                 | 6                 |
|          | 28         | 66                 | 7                 |
| A4       | 30         | 72                 | 8                 |
|          | 29         | 71                 | 6                 |
|          | 7          | 24                 | 4                 |
| B4       | 9          | 30                 | 6                 |
|          | 9          | 29                 | 5                 |
| A1       | 9          | 32                 | 4                 |
|          | 26         | 58                 | 6                 |
|          | 27         | 51                 | 7                 |
| $\alpha$ | 25         | 50                 | 6                 |
|          | 28         | 52                 | 7                 |
|          | 30         | 51                 | 7                 |
|          | 31         | 48                 | 6                 |
| B1       | 29         | 57                 | 5                 |
|          | 28         | 56                 | 6                 |

## Supplementary Material

**Movie 1.** Whisker movements in no (shielded) airflow conditions, low (ambient) airflow conditions and in high airflow conditions. Note the selective engagement of supraorbital whiskers in low airflow conditions.

[https://www.dropbox.com/s/zofn5vkr2920mjn/Movie%201%20Whisker\\_Movements\\_02.mov?dl=0](https://www.dropbox.com/s/zofn5vkr2920mjn/Movie%201%20Whisker_Movements_02.mov?dl=0)

**Movie 2.** Airflow whisker responses recorded *ex vivo* with extracted whiskers.

[https://www.dropbox.com/s/yqc0osgnk2dhlwk/Movie%202%20Whisker\\_movement\\_exvivo\\_3.mov?dl=0](https://www.dropbox.com/s/yqc0osgnk2dhlwk/Movie%202%20Whisker_movement_exvivo_3.mov?dl=0)

**Movie 3.** Rat airflow turning behavior. Movies were taken in the absence of visible light under infrared illumination. Turning responses to a weak (hand-flap) and a strong (cardboard-flap) stimulus are shown.

[https://www.dropbox.com/s/ry0gfl6y15b3fdk/Movie%203%20turning\\_beh\\_3.mov?dl=0](https://www.dropbox.com/s/ry0gfl6y15b3fdk/Movie%203%20turning_beh_3.mov?dl=0)
